# Supplementary material for: Individual and Combined Contamination of the Heavy Metals in Commercial Cat and Dog Food
Source: Research Square preprint supplement (doi:10.21203/rs.3.rs-4838876/v1), 2024-09-08
Supplement: Supplementary file 1 [file 2b898ec3dd0b12f48b7580f2.docx]

Supplemental table 1. Limits of Cr, Cd, Pb, Hg and As in pet food of Chinaa

| Item | Feed products | Limit concentration |
| --- | --- | --- |
| Cr | Pet formulated feed, pet additive premixed feed, and other pet feed | ≤5 mg/kg |
| Cd | Pet formulated feed, pet additive premixed feed, and other pet feed | ≤2 mg/kg |
| Pb | Pet formulated feed | ≤5 mg/kg |
| pet additive premixed feed, and other pet feed | ≤10 mg/kg |
| Hg | Pet formulated feed, pet additive premixed feed, and other pet feed | ≤0.3 mg/kg |
| Total As | Pet formulated feed, pet additive premixed feed and other pet feed containing aquatic animals and their products or algae and algae products | ≤10 mg/kg |
| Pet formulated feed that does not contain aquatic animals and aquatic animals products or algae and algae products | ≤2 mg/kg |
| pet additive premixed feed and other pet feed that do not contain aquatic animals and aquatic animals products or algae and algae products | ≤4 mg/kg |

Note: a:The data in this table is cited from the Hygienical Standard for Pet Feed of China (Announcement No. 20 of 2018).
